# Supplementary material for: Implementation of self-management support in cancer care and normalization into routine practice: a systematic scoping literature review protocol
Source: Springer Nature journal article supplement (doi:10.1186/s13643-019-0952-5), 2019-01-31
Supplement: MOESM3 [file 16434626]

## UHN Health Sciences Libraries

### Literature Search Results

For: Dr. Doris Howell

Date Completed: Oct 3, 2018

Department: Supportive Care

Tel:

Fax:

### Attached is your search for:

Scoping Review: implementation studies of self-management support in the context of cancer care, limited to 1997 to current, and English; excluded conference abstracts.

### The databases searched were:

Ovid MEDLINE(R) 1946 to November 5, 2018

**SEARCH STRATEGY:** See below

**SEARCH RESULTS:** See attached

**Search Completed By:** Original searches done by Junhui Zhang, updated searches done by Rouhi Fazelzad, Information Specialist, 416-946-6539, [rouhi.fazelzad@uhn.ca](mailto:rouhi.fazelzad@uhn.ca)

**It is important that you are satisfied with your search results.  
If you have any questions regarding this search, or if the results were not satisfactory,  
please do not hesitate in contacting me.**

To request items not available in our library system, an INTERLIBRARY LOAN REQUEST FORM can be obtained from the library's circulation desk or through the Virtual Library. Any questions regarding our Document Delivery Service can be directed to Walter by telephone at 416-340-4121 or by email at [Walter.Schmanda@uhn.ca](mailto:Walter.Schmanda@uhn.ca).

For any other circulation inquiries:

Toronto General Hospital Library: (416) 340-3429

Toronto Western Hospital Library: (416) 603-5750

Toronto Rehab Library: (416) 597-3422, ext. 3050

Princess Margaret Library: (416) 946-4482

**Ovid MEDLINE(R) 1946 to November 5, 2018**

| <b>#</b> | <b>Searches</b>             | <b>Results</b> | <b>Type</b> |
|----------|-----------------------------|----------------|-------------|
| 1        | Oncology Service, Hospital/ | 1378           | Advanced    |
| 2        | Cancer Care Facilities/     | 4850           | Advanced    |
| 3        | exp Medical Oncology/       | 19530          | Advanced    |
| 4        | Radiation Oncology/         | 3580           | Advanced    |
| 5        | Surgical Oncology/          | 171            | Advanced    |
| 6        | exp Neoplasms/              | 3087040        | Advanced    |
| 7        | Cancer Survivors/           | 966            | Advanced    |
| 8        | neoplas*.mp,kw.             | 2651809        | Advanced    |
| 9        | paraneoplas*.mp,kw.         | 11919          | Advanced    |
| 10       | cancer*.mp,kw.              | 1373395        | Advanced    |
| 11       | tumo?r*.mp,kw.              | 1753540        | Advanced    |
| 12       | onco*.mp,kw.                | 434132         | Advanced    |
| 13       | metast*.mp,kw.              | 451034         | Advanced    |
| 14       | malignan*.mp,kw.            | 467333         | Advanced    |
| 15       | aberrant crypt foci.mp,kw.  | 1414           | Advanced    |
| 16       | acanthoma*.mp,kw.           | 667            | Advanced    |
| 17       | adamantinom*.mp,kw.         | 934            | Advanced    |
| 18       | adenocarc*.mp,kw.           | 206607         | Advanced    |
| 19       | adenofibrom*.mp,kw.         | 2286           | Advanced    |
| 20       | adenolymphom*.mp,kw.        | 1685           | Advanced    |
| 21       | adenomat*.mp,kw.            | 20454          | Advanced    |
| 22       | adenomyo*.mp,kw.            | 3173           | Advanced    |
| 23       | adenosarcom*.mp,kw.         | 534            | Advanced    |
| 24       | adenosquam*.mp,kw.          | 3223           | Advanced    |
| 25       | ameloblastom*.mp,kw.        | 3976           | Advanced    |

|    |                            |        |          |
|----|----------------------------|--------|----------|
| 26 | androblastom*.mp,kw.       | 323    | Advanced |
| 27 | angiofibrom*.mp,kw.        | 2024   | Advanced |
| 28 | angiokeratom*.mp,kw.       | 1050   | Advanced |
| 29 | angiolipom*.mp,kw.         | 591    | Advanced |
| 30 | angioma*.mp,kw.            | 12164  | Advanced |
| 31 | angiomyolipom*.mp,kw.      | 3500   | Advanced |
| 32 | angiomyom*.mp,kw.          | 550    | Advanced |
| 33 | angiosarcom*.mp,kw.        | 5187   | Advanced |
| 34 | apudoma*.mp,kw.            | 559    | Advanced |
| 35 | arrhenoblastom*.mp,kw.     | 348    | Advanced |
| 36 | astrocytom*.mp,kw.         | 19938  | Advanced |
| 37 | blastom*.mp,kw.            | 10150  | Advanced |
| 38 | Bowen*.mp,kw.              | 3085   | Advanced |
| 39 | Brenner*.mp,kw.            | 1382   | Advanced |
| 40 | Buschke-Lowenstein*.mp,kw. | 242    | Advanced |
| 41 | carcin*.mp,kw.             | 878408 | Advanced |
| 42 | cementoma*.mp,kw.          | 479    | Advanced |
| 43 | chemodectomas*.mp,kw.      | 294    | Advanced |
| 44 | cholangiocarcin*.mp,kw.    | 10728  | Advanced |
| 45 | chondroblastom*.mp,kw.     | 1268   | Advanced |
| 46 | chondroma*.mp,kw.          | 6081   | Advanced |
| 47 | chordoma*.mp,kw.           | 3864   | Advanced |
| 48 | chondrosarcom*.mp,kw.      | 8582   | Advanced |
| 49 | choriocarcin*.mp,kw.       | 8847   | Advanced |
| 50 | craniopharyngioma*.mp,kw.  | 5021   | Advanced |
| 51 | cystadenofibrom*.mp,kw.    | 205    | Advanced |
| 52 | cystosarcom*.mp,kw.        | 610    | Advanced |
| 53 | cytoma*.mp,kw.             | 319    | Advanced |

|    |                             |       |          |
|----|-----------------------------|-------|----------|
| 54 | dermatofibrosarcom*.mp,kw.  | 1768  | Advanced |
| 55 | desmoplas*.mp,kw.           | 3762  | Advanced |
| 56 | dysgerminoma*.mp,kw.        | 6030  | Advanced |
| 57 | DCIS.mp,kw.                 | 3952  | Advanced |
| 58 | DSRCT.mp,kw.                | 236   | Advanced |
| 59 | ependymom*.mp,kw.           | 6275  | Advanced |
| 60 | Ewing*.mp,kw.               | 9396  | Advanced |
| 61 | fibroadenom*.mp,kw.         | 3917  | Advanced |
| 62 | fibroepithelial*.mp,kw.     | 861   | Advanced |
| 63 | fibroma*.mp,kw.             | 17794 | Advanced |
| 64 | fibrosarcom*.mp,kw.         | 16080 | Advanced |
| 65 | FAMMM.mp,kw.                | 70    | Advanced |
| 66 | gangliogliom*.mp,kw.        | 1412  | Advanced |
| 67 | ganglioneurom*.mp,kw.       | 3042  | Advanced |
| 68 | gastrinoma*.mp,kw.          | 1790  | Advanced |
| 69 | germinoma*.mp,kw.           | 3818  | Advanced |
| 70 | glioblastom*.mp,kw.         | 31783 | Advanced |
| 71 | glioma*.mp,kw.              | 52493 | Advanced |
| 72 | gliosarcom*.mp,kw.          | 1148  | Advanced |
| 73 | glomus jugulare*.mp,kw.     | 1325  | Advanced |
| 74 | glomus tympanicum*.mp,kw.   | 249   | Advanced |
| 75 | glucagonoma*.mp,kw.         | 1090  | Advanced |
| 76 | gonadoblastom*.mp,kw.       | 766   | Advanced |
| 77 | GCTOB.mp,kw.                | 6     | Advanced |
| 78 | GIST?.mp,kw.                | 5759  | Advanced |
| 79 | hemangioendotheliom*.mp,kw. | 3997  | Advanced |
| 80 | hemangiom*.mp,kw.           | 31377 | Advanced |
| 81 | hemangiopericytom*.mp,kw.   | 3443  | Advanced |

|     |                                    |        |          |
|-----|------------------------------------|--------|----------|
| 82  | hemangiosarcom*.mp,kw.             | 6987   | Advanced |
| 83  | hamartoblastom*.mp,kw.             | 46     | Advanced |
| 84  | hepatoblastom*.mp,kw.              | 3253   | Advanced |
| 85  | hepatoma*.mp,kw.                   | 26524  | Advanced |
| 86  | histiocytom*.mp,kw.                | 8222   | Advanced |
| 87  | hodgkin*.mp,kw.                    | 83604  | Advanced |
| 88  | nonhodgkin*.mp,kw.                 | 113    | Advanced |
| 89  | (hutchinson* adj2 freckle*).mp,kw. | 642    | Advanced |
| 90  | HNPCC.mp,kw.                       | 2093   | Advanced |
| 91  | immunocytom*.mp,kw.                | 593    | Advanced |
| 92  | incidentaloma?.mp,kw.              | 1622   | Advanced |
| 93  | insulinoma*.mp,kw.                 | 6945   | Advanced |
| 94  | kasabach merrit*.mp,kw.            | 654    | Advanced |
| 95  | leiomyoblastom*.mp,kw.             | 392    | Advanced |
| 96  | leiomyom*.mp,kw.                   | 21840  | Advanced |
| 97  | leiomyosarcom*.mp,kw.              | 10784  | Advanced |
| 98  | leukem*.mp,kw.                     | 286615 | Advanced |
| 99  | preleukem*.mp,kw.                  | 2006   | Advanced |
| 100 | leukoplak*.mp,kw.                  | 5991   | Advanced |
| 101 | li-fraumeni*.mp,kw.                | 1142   | Advanced |
| 102 | lipoblastom*.mp,kw.                | 431    | Advanced |
| 103 | lipoma*.mp,kw.                     | 17104  | Advanced |
| 104 | liposarcom*.mp,kw.                 | 6248   | Advanced |
| 105 | luteoma*.mp,kw.                    | 213    | Advanced |
| 106 | lymphangio*.mp,kw.                 | 13663  | Advanced |
| 107 | lymphoblastom*.mp,kw.              | 360    | Advanced |
| 108 | lymphocytom*.mp,kw.                | 324    | Advanced |
| 109 | lymphoma*.mp,kw.                   | 211907 | Advanced |

|     |                            |        |          |
|-----|----------------------------|--------|----------|
| 110 | lymphosarcom*.mp,kw.       | 5059   | Advanced |
| 111 | lynch*.mp,kw.              | 3029   | Advanced |
| 112 | macroglobulinem*.mp,kw.    | 5707   | Advanced |
| 113 | m?croprolactinom*.mp,kw.   | 708    | Advanced |
| 114 | mastocytom*.mp,kw.         | 1989   | Advanced |
| 115 | mastocytos?s*.mp,kw.       | 3676   | Advanced |
| 116 | medulloblastom*.mp,kw.     | 8505   | Advanced |
| 117 | meigs*.mp,kw.              | 836    | Advanced |
| 118 | melanoameloblastom*.mp,kw. | 11     | Advanced |
| 119 | melanoblastom*.mp,kw.      | 489    | Advanced |
| 120 | melanocarcin*.mp,kw.       | 100    | Advanced |
| 121 | melanoma*.mp,kw.           | 111605 | Advanced |
| 122 | melanosis.mp,kw.           | 3965   | Advanced |
| 123 | melanotic*.mp,kw.          | 2829   | Advanced |
| 124 | meningiom*.mp,kw.          | 21844  | Advanced |
| 125 | mesenchymom*.mp,kw.        | 2040   | Advanced |
| 126 | mesoblast*.mp,kw.          | 722    | Advanced |
| 127 | mesonephrom*.mp,kw.        | 1161   | Advanced |
| 128 | mesotheliom*.mp,kw.        | 15927  | Advanced |
| 129 | metaplas*.mp,kw.           | 21863  | Advanced |
| 130 | micrometast*.mp,kw.        | 5898   | Advanced |
| 131 | muir-torre*.mp,kw.         | 385    | Advanced |
| 132 | myelolipom*.mp,kw.         | 966    | Advanced |
| 133 | myoepitheliom*.mp,kw.      | 1233   | Advanced |
| 134 | myofibrom*.mp,kw.          | 708    | Advanced |
| 135 | myeloma*.mp,kw.            | 52544  | Advanced |
| 136 | myoma*.mp,kw.              | 5633   | Advanced |
| 137 | myosarcom*.mp,kw.          | 401    | Advanced |

|     |                          |       |          |
|-----|--------------------------|-------|----------|
| 138 | myxofibrosarcom*.mp,kw.  | 382   | Advanced |
| 139 | myxoma*.mp,kw.           | 9327  | Advanced |
| 140 | myxosarcom*.mp,kw.       | 453   | Advanced |
| 141 | n?evocarcin*.mp,kw.      | 78    | Advanced |
| 142 | neurilemmom*.mp,kw.      | 13257 | Advanced |
| 143 | neurocytom*.mp,kw.       | 752   | Advanced |
| 144 | neuroectodermal*.mp,kw.  | 7747  | Advanced |
| 145 | neurofibroma*.mp,kw.     | 18908 | Advanced |
| 146 | neurofibrosarcom*.mp,kw. | 465   | Advanced |
| 147 | neurilemmom*.mp,kw.      | 13257 | Advanced |
| 148 | neuroblastom*.mp,kw.     | 37418 | Advanced |
| 149 | neuroma*.mp,kw.          | 13178 | Advanced |
| 150 | neurothekeom*.mp,kw.     | 243   | Advanced |
| 151 | NSCLC.mp,kw.             | 27996 | Advanced |
| 152 | odontoma*.mp,kw.         | 1378  | Advanced |
| 153 | oligodendrogliom*.mp,kw. | 4996  | Advanced |
| 154 | oligometast*.mp,kw.      | 806   | Advanced |
| 155 | osteoblastom*.mp,kw.     | 1127  | Advanced |
| 156 | osteochondrom*.mp,kw.    | 2880  | Advanced |
| 157 | osteoclastom*.mp,kw.     | 324   | Advanced |
| 158 | osteoma*.mp,kw.          | 12856 | Advanced |
| 159 | osteosarcom*.mp,kw.      | 26069 | Advanced |
| 160 | papilloma*.mp,kw.        | 60375 | Advanced |
| 161 | papillary*.mp,kw.        | 57997 | Advanced |
| 162 | paragangliom*.mp,kw.     | 7616  | Advanced |
| 163 | pheochromocytom*.mp,kw.  | 20296 | Advanced |
| 164 | phyllo?des*.mp,kw.       | 2118  | Advanced |
| 165 | pinealocytoma*.mp,kw.    | 14    | Advanced |

|     |                                 |         |          |
|-----|---------------------------------|---------|----------|
| 166 | pinealoma*.mp,kw.               | 1849    | Advanced |
| 167 | pineoblastoma*.mp,kw.           | 348     | Advanced |
| 168 | pineocytoma*.mp,kw.             | 240     | Advanced |
| 169 | plasmacytom*.mp,kw.             | 10099   | Advanced |
| 170 | (polycythem* adj2 vera?).mp,kw. | 7113    | Advanced |
| 171 | prolactinom*.mp,kw.             | 3842    | Advanced |
| 172 | retinoblastom*.mp,kw.           | 20321   | Advanced |
| 173 | rhabdoid*.mp,kw.                | 2209    | Advanced |
| 174 | rhabdomyom*.mp,kw.              | 1604    | Advanced |
| 175 | rhabdomyosarcom*.mp,kw.         | 13143   | Advanced |
| 176 | sarcom*.mp,kw.                  | 117035  | Advanced |
| 177 | seminoma*.mp,kw.                | 7012    | Advanced |
| 178 | Sertoli- Leydig.mp,kw.          | 1102    | Advanced |
| 179 | somatostatinoma*.mp,kw.         | 436     | Advanced |
| 180 | somatotrophinom*.mp,kw.         | 71      | Advanced |
| 181 | struma ovarii*.mp,kw.           | 601     | Advanced |
| 182 | thecoma*.mp,kw.                 | 1031    | Advanced |
| 183 | teratocarcin*.mp,kw.            | 2777    | Advanced |
| 184 | teratoma*.mp,kw.                | 20372   | Advanced |
| 185 | thymom*.mp,kw.                  | 10041   | Advanced |
| 186 | trophoblast*.mp,kw.             | 23078   | Advanced |
| 187 | vipoma*.mp,kw.                  | 588     | Advanced |
| 188 | wilms*.mp,kw.                   | 11820   | Advanced |
| 189 | or/1-188                        | 4093224 | Advanced |
| 190 | Self-Management/                | 697     | Advanced |
| 191 | exp Self Care/                  | 50444   | Advanced |
| 192 | Self Administration/            | 10651   | Advanced |
| 193 | Self Medication/                | 4476    | Advanced |



|     |                                                   |       |          |
|-----|---------------------------------------------------|-------|----------|
| 194 | Self Efficacy/                                    | 17599 | Advanced |
| 195 | Patient Participation/                            | 22945 | Advanced |
| 196 | exp Cognitive Therapy/                            | 24260 | Advanced |
| 197 | self car*.mp,kw.                                  | 37538 | Advanced |
| 198 | selfcar*.mp,kw.                                   | 93    | Advanced |
| 199 | self manag*.mp,kw.                                | 13178 | Advanced |
| 200 | selfmanag*.mp,kw.                                 | 27    | Advanced |
| 201 | self administ*.mp,kw.                             | 38997 | Advanced |
| 202 | selfadminist*.mp,kw.                              | 46    | Advanced |
| 203 | self medicat*.mp,kw.                              | 6426  | Advanced |
| 204 | selfmedicat*.mp,kw.                               | 12    | Advanced |
| 205 | self monitor*.mp,kw.                              | 10039 | Advanced |
| 206 | selfmonitor*.mp,kw.                               | 15    | Advanced |
| 207 | self efficac*.mp,kw.                              | 26299 | Advanced |
| 208 | selfefficac*.mp,kw.                               | 17    | Advanced |
| 209 | self guid*.mp,kw.                                 | 399   | Advanced |
| 210 | selfguid*.mp,kw.                                  | 0     | Advanced |
| 211 | self regulat*.mp,kw.                              | 8505  | Advanced |
| 212 | selfregulat*.mp,kw.                               | 24    | Advanced |
| 213 | self direct*.mp,kw.                               | 4072  | Advanced |
| 214 | selfdirect*.mp,kw.                                | 9     | Advanced |
| 215 | self determin*.mp,kw.                             | 3912  | Advanced |
| 216 | selfdetermin*.mp,kw.                              | 3     | Advanced |
| 217 | (personal adj2 manag*).mp,kw.                     | 598   | Advanced |
| 218 | ((patient? or client?) adj2 participat*).mp,kw.   | 36954 | Advanced |
| 219 | [((patient? or client?) adj2 empower*).mp,kw.]    | 0     | Advanced |
| 220 | [((patient? or client?) adj2 activation*).mp,kw.] | 0     | Advanced |
| 221 | [((patient? or client?) adj2 engag*).mp,kw.]      | 0     | Advanced |

|     |                                            |        |          |
|-----|--------------------------------------------|--------|----------|
| 222 | (cognitive adj3 therap*).mp,kw.            | 27400  | Advanced |
| 223 | (psychoeducat* or psycho-educat*).mp,kw.   | 4529   | Advanced |
| 224 | (nurs*-led adj6 surviv*).mp,kw.            | 15     | Advanced |
| 225 | (peer-led adj6 surviv*).mp,kw.             | 2      | Advanced |
| 226 | or/190-225                                 | 196454 | Advanced |
| 227 | Health Plan Implementation/                | 5178   | Advanced |
| 228 | Regional Health Planning/                  | 5281   | Advanced |
| 229 | Health Planning Guidelines/                | 4008   | Advanced |
| 230 | Health Care Reform/                        | 31451  | Advanced |
| 231 | Organizational Policy/                     | 13665  | Advanced |
| 232 | Policy/                                    | 1905   | Advanced |
| 233 | Policy Making/                             | 15071  | Advanced |
| 234 | Decision Making/                           | 85198  | Advanced |
| 235 | Organizational Innovation/                 | 23361  | Advanced |
| 236 | "Delivery of Health Care, Integrated"/     | 11176  | Advanced |
| 237 | Program Development/                       | 27021  | Advanced |
| 238 | "Diffusion of Innovation"/                 | 16626  | Advanced |
| 239 | Information Dissemination/                 | 14646  | Advanced |
| 240 | Translational Medical Research/            | 8695   | Advanced |
| 241 | Pragmatic Clinical Trials As Topic/        | 209    | Advanced |
| 242 | Quality Improvement/                       | 18007  | Advanced |
| 243 | implement*.tw,kw.                          | 322076 | Advanced |
| 244 | (plan* adj2 manag*).mp,kw.                 | 11222  | Advanced |
| 245 | (plan* adj2 guideline?).mp,kw.             | 4497   | Advanced |
| 246 | (care? adj2 reform*).mp,kw.                | 34291  | Advanced |
| 247 | (policy or policies).tw,kw.                | 183533 | Advanced |
| 248 | (decision? adj2 (maker? or making)).tw,kw. | 104654 | Advanced |
| 249 | innovat*.tw,kw.                            | 86820  | Advanced |

|     |                                              |         |          |
|-----|----------------------------------------------|---------|----------|
| 250 | diffusion.tw,kw.                             | 131599  | Advanced |
| 251 | disseminat*.tw,kw.                           | 98535   | Advanced |
| 252 | ((knowledge or kt) adj2 translat*).mp,kw.    | 2838    | Advanced |
| 253 | ((knowledge or kt) adj2 transfer*).mp,kw.    | 1920    | Advanced |
| 254 | ((knowledge or kt) adj2 manag*).mp,kw.       | 2567    | Advanced |
| 255 | ((knowledge or kt) adj2 exchang*).mp,kw.     | 709     | Advanced |
| 256 | ((knowledge or kt) adj2 mobilit*).mp,kw.     | 24      | Advanced |
| 257 | ((knowledge or kt) adj2 diffus*).mp,kw.      | 174     | Advanced |
| 258 | ((knowledge or kt) adj2 creat*).mp,kw.       | 821     | Advanced |
| 259 | ((knowledge or kt) adj2 utili*).mp,kw.       | 813     | Advanced |
| 260 | (knowledge adj2 care?).mp,kw.                | 2233    | Advanced |
| 261 | (program* adj2 develop*).mp,kw.              | 55615   | Advanced |
| 262 | (program* adj2 (improv* or outcome?)).mp,kw. | 17256   | Advanced |
| 263 | (organi?ational adj2 chang*).mp,kw.          | 2819    | Advanced |
| 264 | (behavio?r* adj2 chang*).mp,kw.              | 35761   | Advanced |
| 265 | (pragmatic adj2 trial?).mp,kw.               | 2050    | Advanced |
| 266 | (qualit* adj2 improv*).mp,kw.                | 98972   | Advanced |
| 267 | (framework? or frame work?).mp,kw.           | 165447  | Advanced |
| 268 | adoption*.tw,kw.                             | 34264   | Advanced |
| 269 | enabling.mp,kw.                              | 49697   | Advanced |
| 270 | "real world".mp,kw.                          | 20220   | Advanced |
| 271 | "plan-do-study-act".mp,kw.                   | 411     | Advanced |
| 272 | "participatory action research".mp,kw.       | 840     | Advanced |
| 273 | StaRI.mp,kw.                                 | 258     | Advanced |
| 274 | PDSA.mp,kw.                                  | 233     | Advanced |
| 275 | Implementation Science*.jw.                  | 1056    | Advanced |
| 276 | or/227-275                                   | 1351901 | Advanced |
| 277 | 189 and 226 and 276                          | 4356    | Advanced |

|     |                                                                                                                                              |         |          |
|-----|----------------------------------------------------------------------------------------------------------------------------------------------|---------|----------|
| 278 | limit 277 to "all child (0 to 18 years)"                                                                                                     | 481     | Advanced |
| 279 | limit 277 to "all adult (19 plus years)"                                                                                                     | 2723    | Advanced |
| 280 | 278 not 279                                                                                                                                  | 120     | Advanced |
| 281 | 277 not 280                                                                                                                                  | 4236    | Advanced |
| 282 | limit 281 to (clinical conference or consensus development conference or consensus development conference, nih or news or newspaper article) | 27      | Advanced |
| 283 | 281 not 282                                                                                                                                  | 4209    | Advanced |
| 284 | limit 283 to yr="1997 -Current"                                                                                                              | 3903    | Advanced |
| 285 | limit 284 to english language                                                                                                                | 3694    | Advanced |
| 286 | aware*.mp,kw.                                                                                                                                | 169900  | Advanced |
| 287 | (uptake or up-take).mp,kw.                                                                                                                   | 317377  | Advanced |
| 288 | (takeup or take-up).mp,kw.                                                                                                                   | 7961    | Advanced |
| 289 | adhere*.mp,kw.                                                                                                                               | 170823  | Advanced |
| 290 | concordan*.mp,kw.                                                                                                                            | 51122   | Advanced |
| 291 | accordan*.mp,kw.                                                                                                                             | 50755   | Advanced |
| 292 | (comply* or complies or compliance).mp,kw.                                                                                                   | 145144  | Advanced |
| 293 | spread*.mp,kw.                                                                                                                               | 164080  | Advanced |
| 294 | barrier?.mp,kw.                                                                                                                              | 211473  | Advanced |
| 295 | facilitat*.mp,kw.                                                                                                                            | 388942  | Advanced |
| 296 | advice?.mp,kw.                                                                                                                               | 38203   | Advanced |
| 297 | advise?.mp,kw.                                                                                                                               | 25276   | Advanced |
| 298 | standard?.mp,kw.                                                                                                                             | 1357997 | Advanced |
| 299 | statement?.mp,kw.                                                                                                                            | 50576   | Advanced |
| 300 | or/286-299                                                                                                                                   | 2839360 | Advanced |
| 301 | 189 and 226 and 300                                                                                                                          | 5399    | Advanced |
| 302 | limit 301 to "all child (0 to 18 years)"                                                                                                     | 696     | Advanced |
| 303 | limit 301 to "all adult (19 plus years)"                                                                                                     | 3745    | Advanced |

|     |                                                                                                                                              |         |          |
|-----|----------------------------------------------------------------------------------------------------------------------------------------------|---------|----------|
| 304 | 302 not 303                                                                                                                                  | 141     | Advanced |
| 305 | 301 not 304                                                                                                                                  | 5258    | Advanced |
| 306 | limit 305 to (clinical conference or consensus development conference or consensus development conference, nih or news or newspaper article) | 23      | Advanced |
| 307 | 305 not 306                                                                                                                                  | 5235    | Advanced |
| 308 | limit 307 to yr="1997 -Current"                                                                                                              | 4842    | Advanced |
| 309 | limit 308 to english language                                                                                                                | 4625    | Advanced |
| 310 | 285 or 309                                                                                                                                   | 6685    | Advanced |
| 311 | 310 not 285                                                                                                                                  | 2991    | Advanced |
| 312 | empower*.mp,kw.                                                                                                                              | 17459   | Advanced |
| 313 | activat*.mp,kw.                                                                                                                              | 1495996 | Advanced |
| 314 | engag*.mp,kw.                                                                                                                                | 119413  | Advanced |
| 315 | integrat*.mp,kw.                                                                                                                             | 367587  | Advanced |
| 316 | 312 or 313 or 314 or 315                                                                                                                     | 1946537 | Advanced |
| 317 | 189 and 226 and 316                                                                                                                          | 1679    | Advanced |
| 318 | limit 317 to (english language and yr="1997 - Current")                                                                                      | 1538    | Advanced |
| 319 | 285 or 318                                                                                                                                   | 4623    | Advanced |
